# Supplementary figures and images for: PADI4 Epigenetically Suppresses p21 Transcription and Inhibits Cell Apoptosis in Fibroblast-like Synoviocytes from Rheumatoid Arthritis Patients
Source: PubMed Central journal article supplement — Int J Biol Sci. 2017 Feb 25;13(3):358–66. doi: 10.7150/ijbs.16879 (PMC5370443; doi:10.7150/ijbs.16879), 2017-02-25

Fig. S1

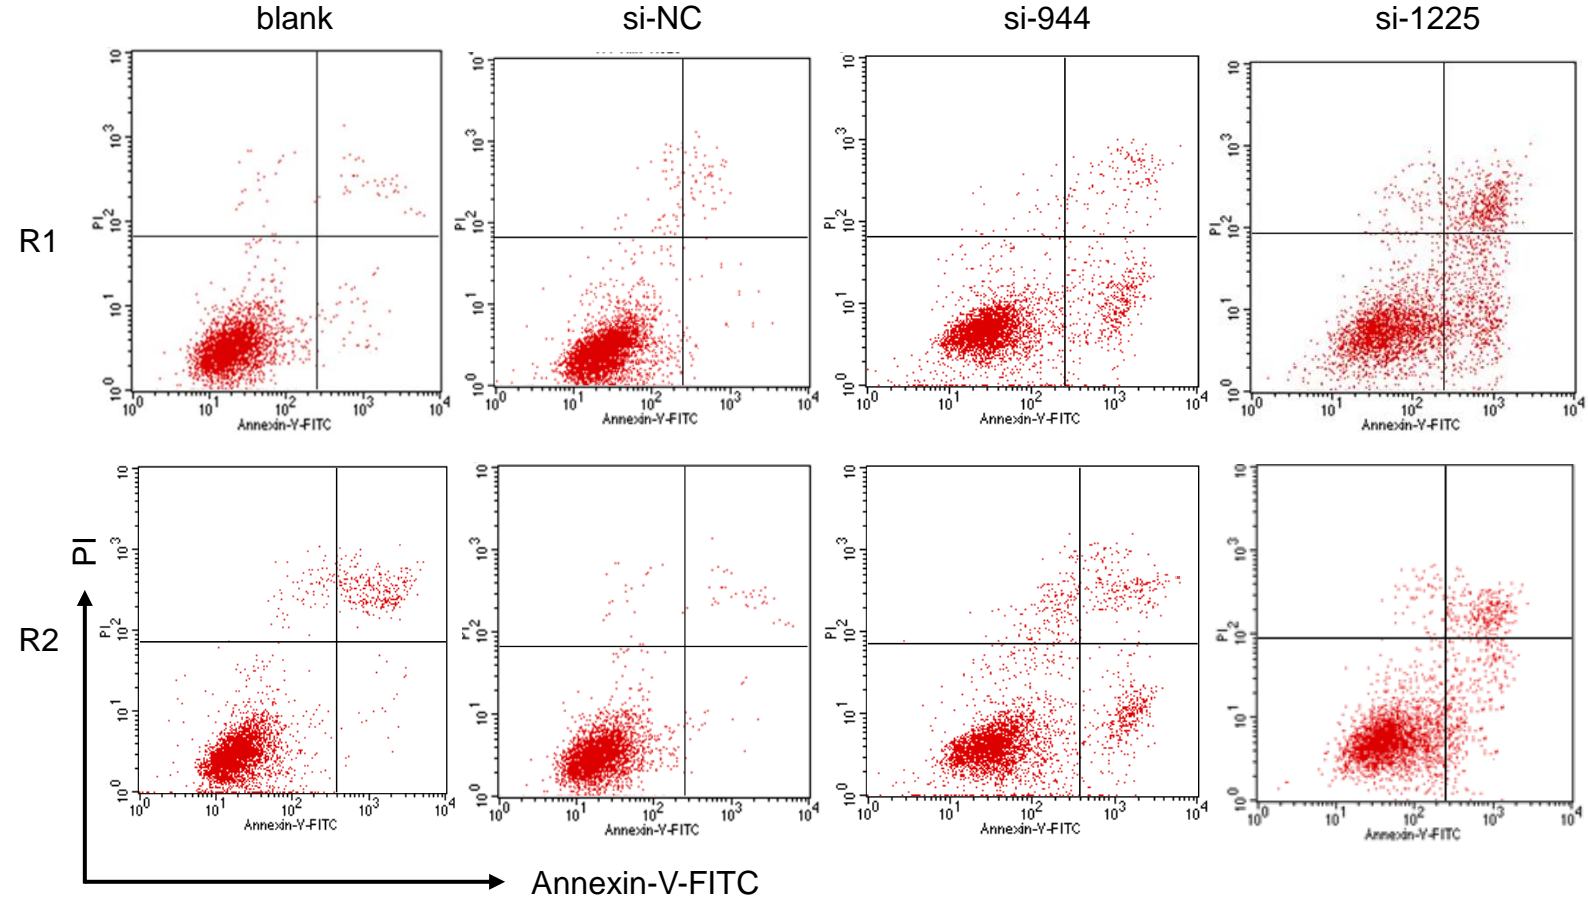

Fig. S2

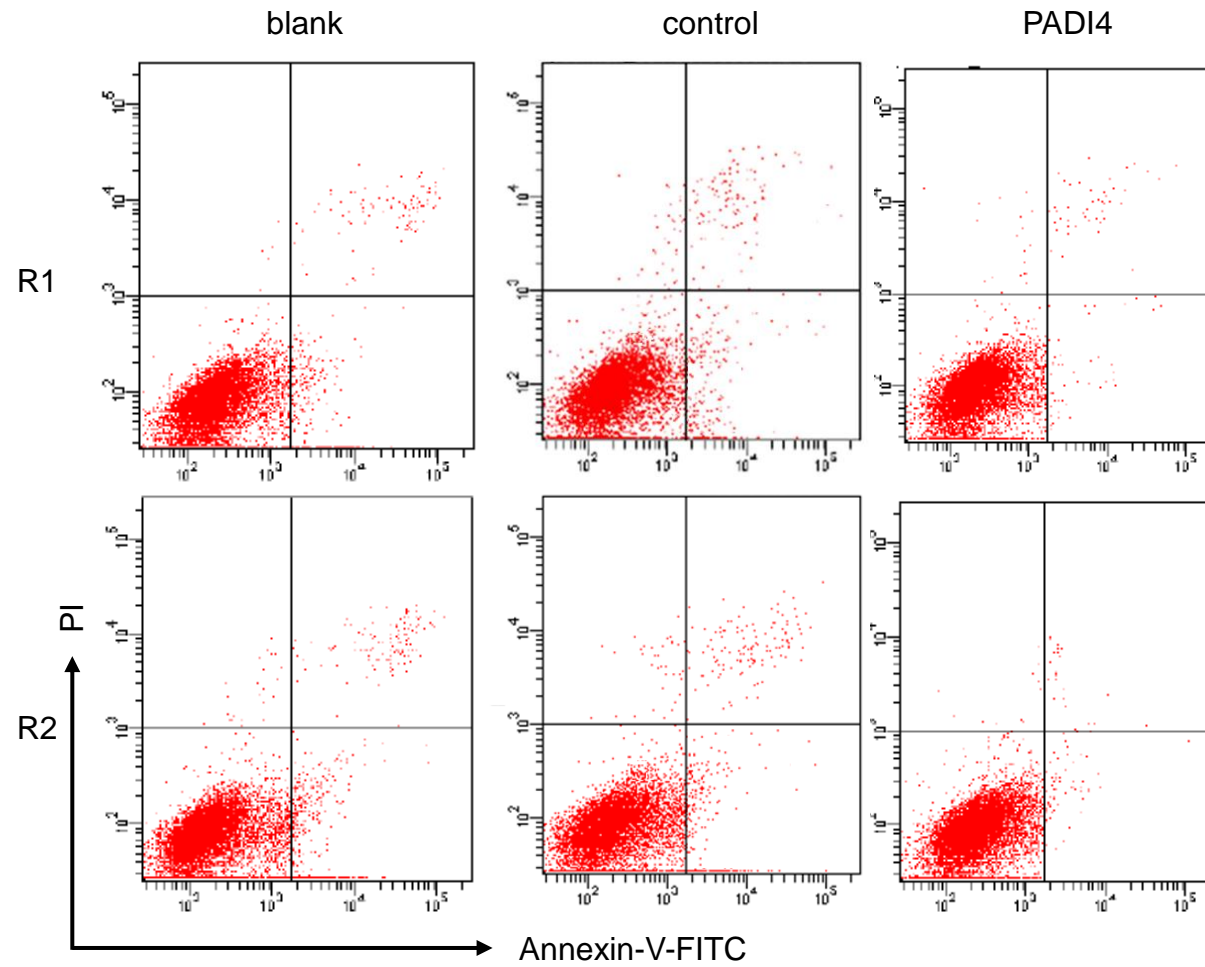

Fig. S3

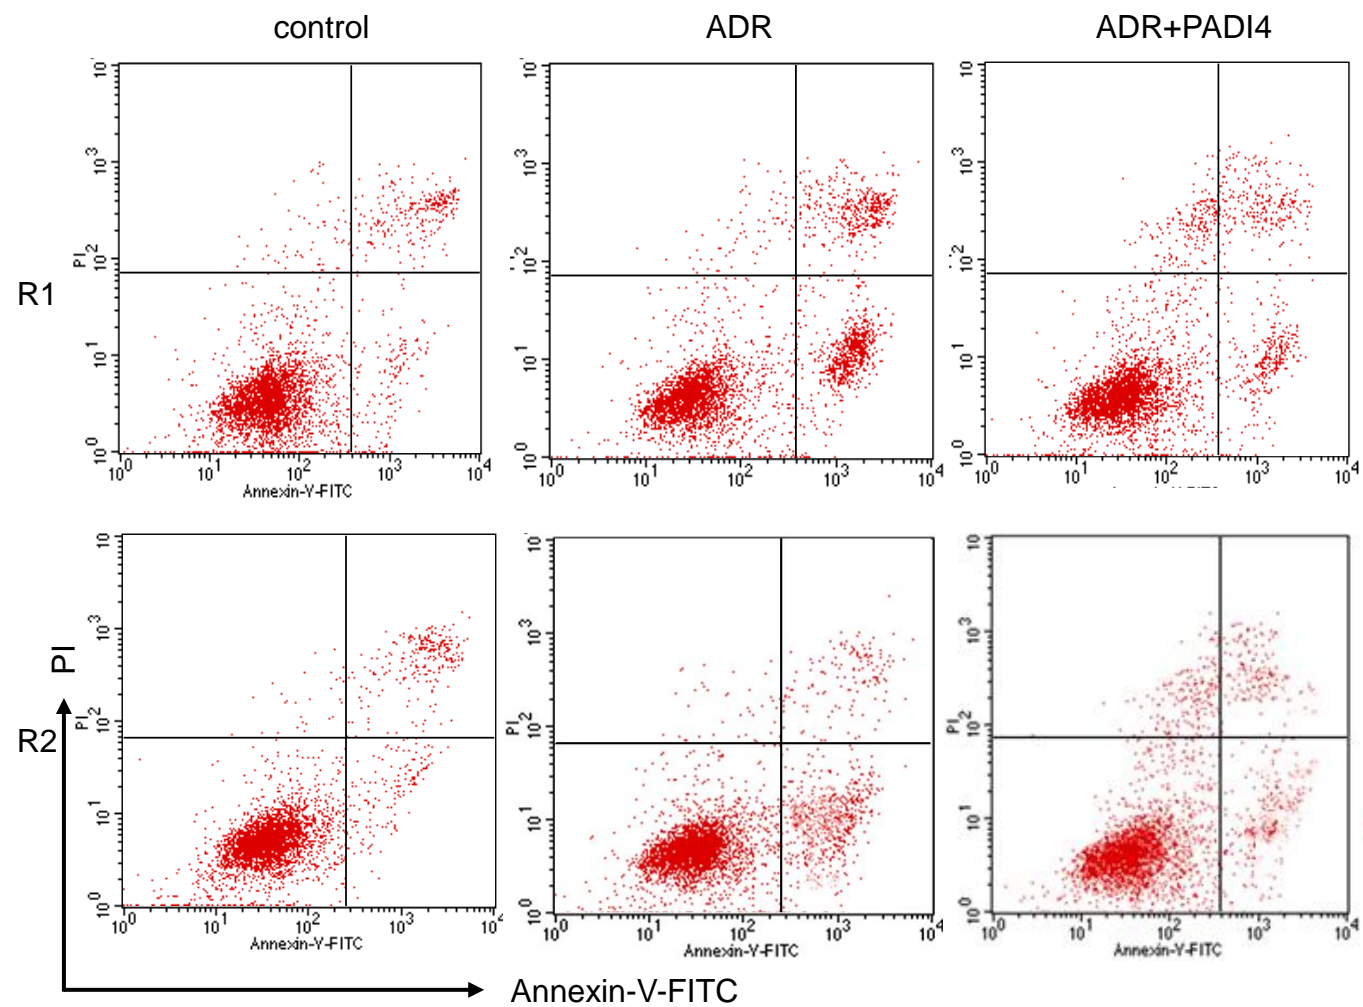

Supplement: ijbsv13p0358s1.pdf [file ijbsv13p0358s1.pdf]
